# Supplementary material for: Designing conductive networks of hybrid carbon enables stable and long-lifespan cotton-fiber-based lithium–sulfur batteries
Source: Royal Society of Chemistry journal article supplement (doi:10.1039/d1ra06568h), 2021-01-01
Supplement: d1ra06568h1.pdf [file d1ra06568h1.pdf]

## Supplementary Material

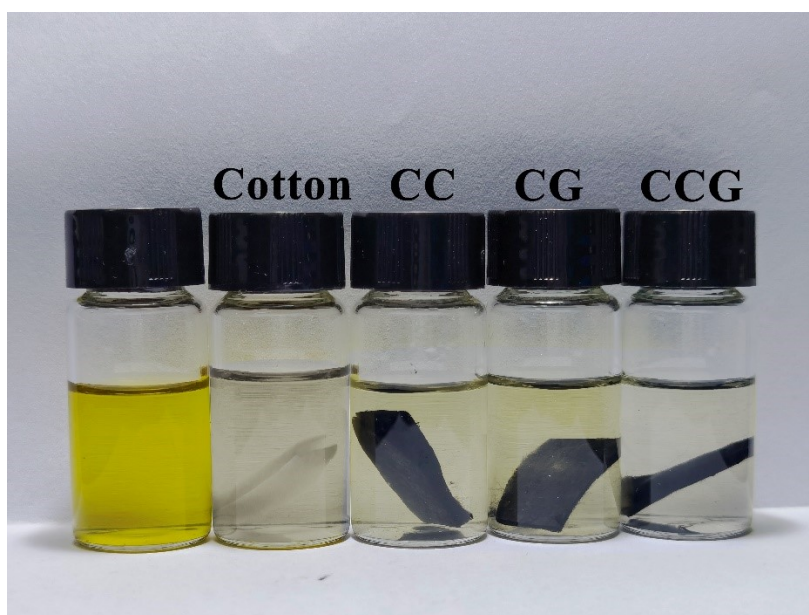

**Figure S1. Photograph of different substrate with  $\text{Li}_2\text{S}_6$  polysulfide absorption test after 24 h.**

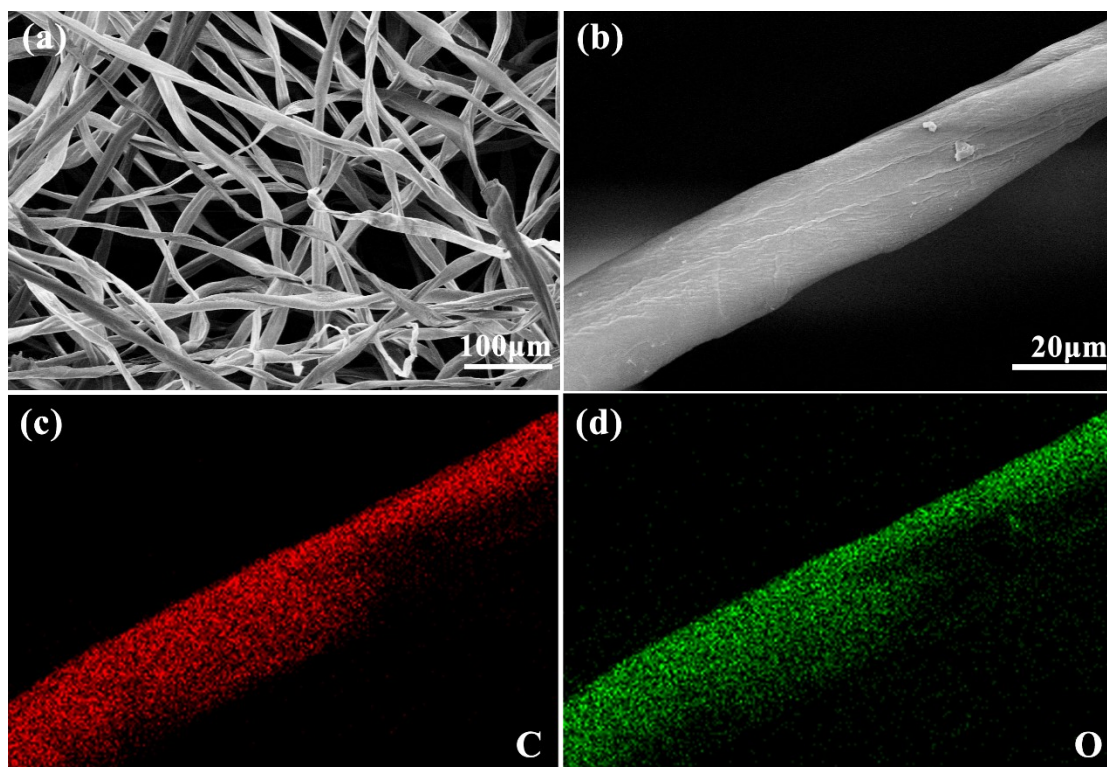

**Figure S2. SEM images of cotton fibers at (a) low magnification, (b) higher**

magnification, (c) corresponding mapping of C element, (d) corresponding mapping of O element.

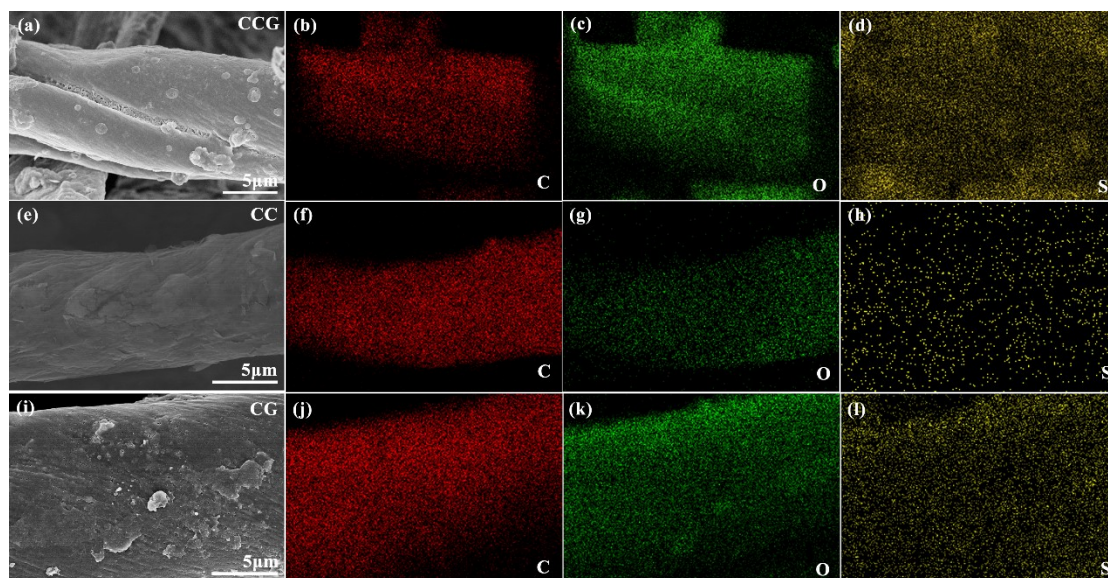

**Figure S3. (a-d) SEM images of CCG substate after 50 cycles of charge and discharge and elemental mappings of C, O, S from the fibers. (e-h) SEM images of CC substate after 50 cycles of charge and discharge and elemental mappings of C, O, S from the fibers, (i-l) SEM images of CG substate after 50 cycles of charge and discharge and elemental mappings of C, O, S from the fibers.**

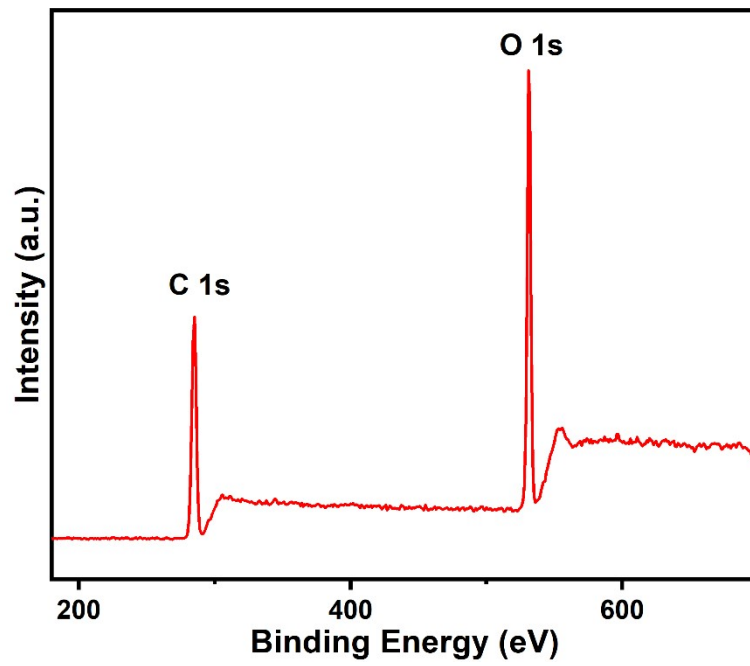

Figure S4. XPS survey spectra of cotton fibers.

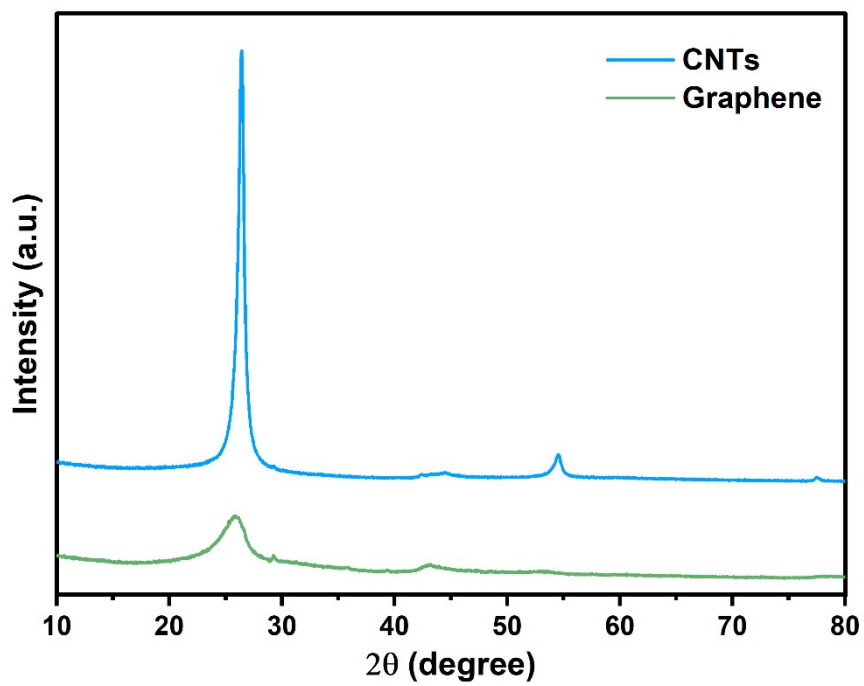

Figure S5. XRD patterns of CNTs and graphene.

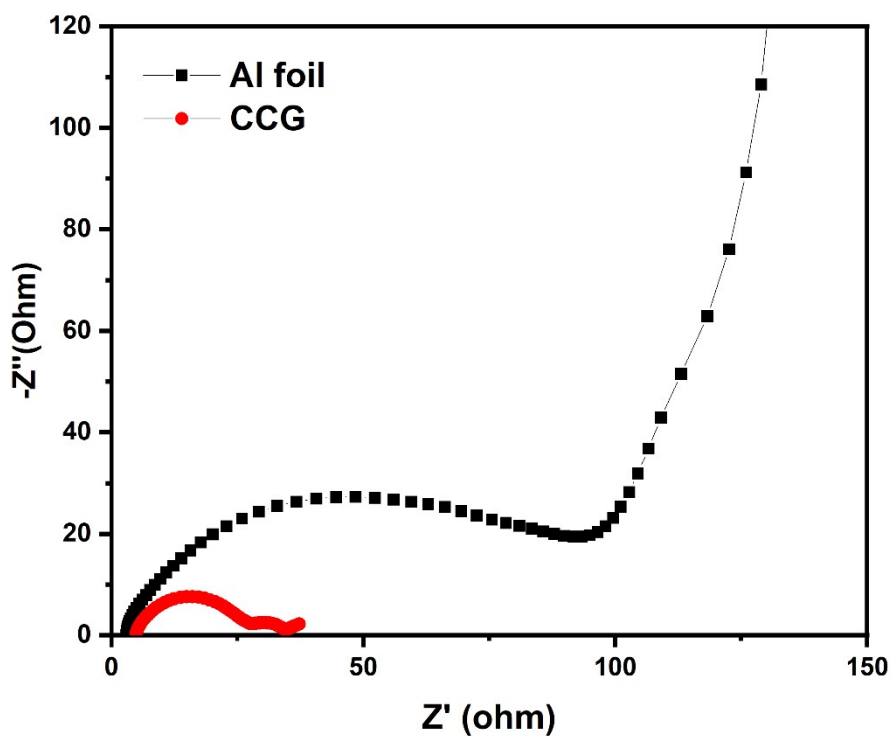

Figure S6. Nyquist plot of electrochemical impedance spectroscopy (EIS) data of Li-S batteries using CCG substrates and traditional Al foil current collector.

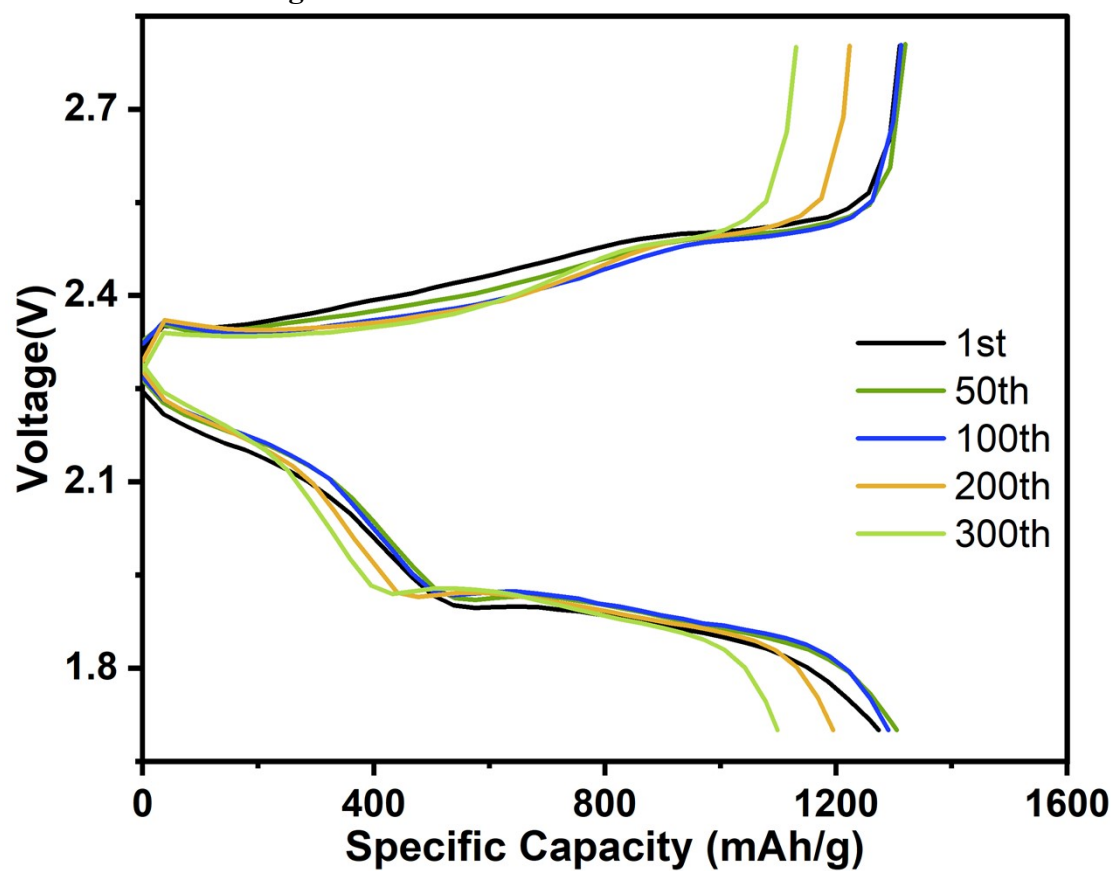

Figure S7. Voltage profiles of battery with CCG substrate at 1.0 C from 1th to 300th.

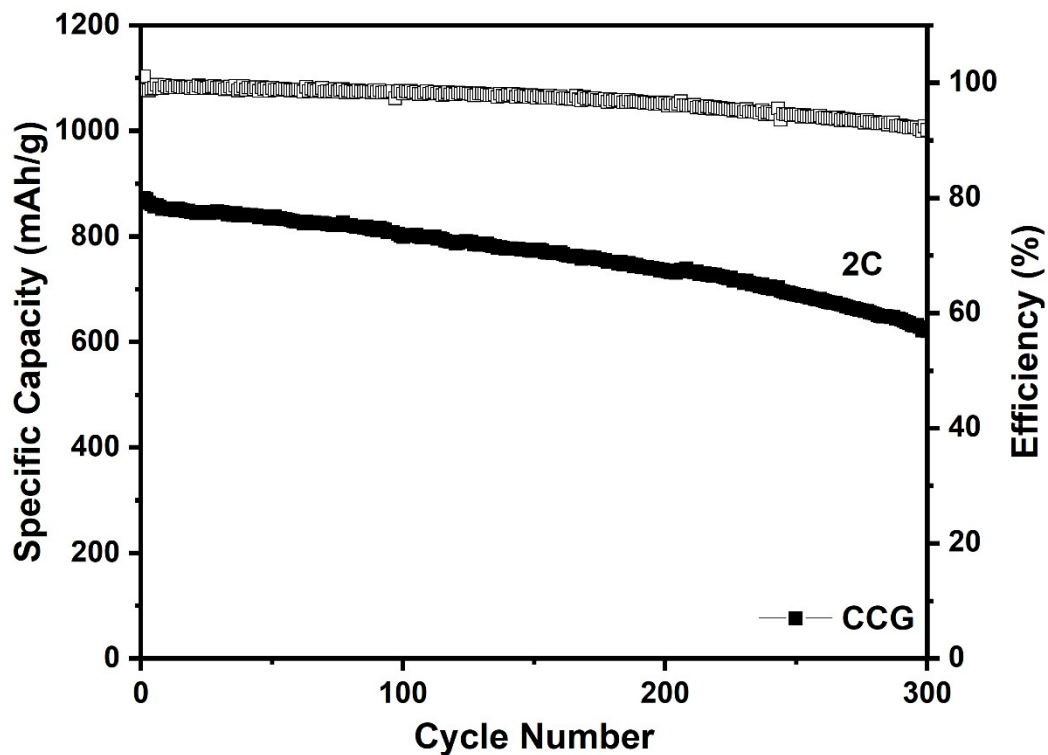

Figure S8. CCG batteries with a sulfur loading of  $2.0 \text{ mg cm}^{-2}$  charge-discharge cycling curve at 2.0 C.

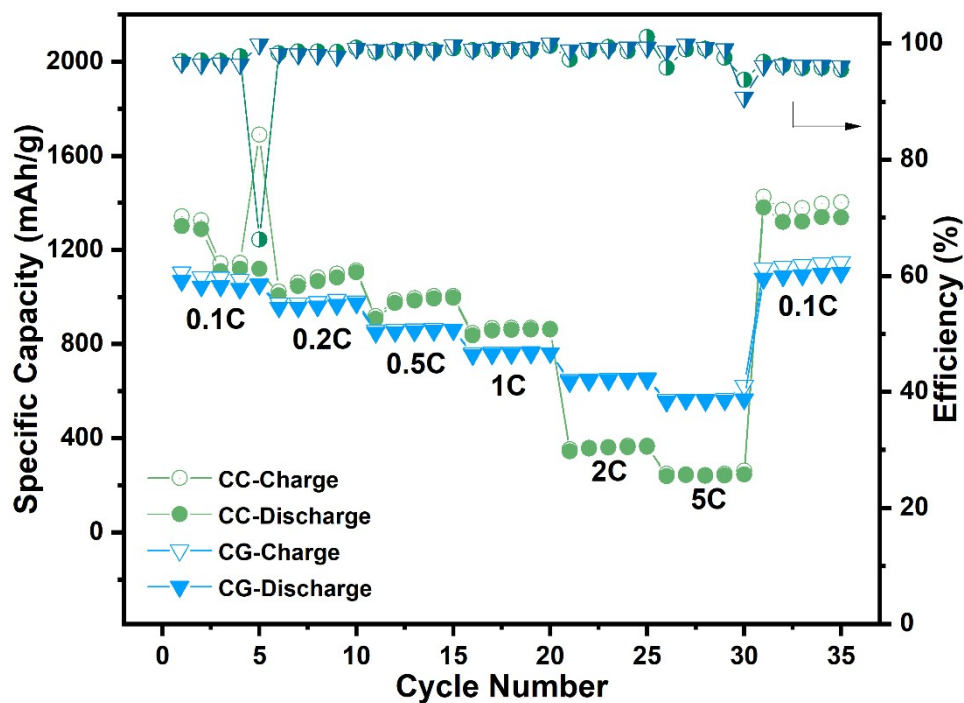

Figure S9. Rate performances of the batteries with CC and CG substrates.
